# Supplementary material
Source: PubMed Central journal article supplement (PMC7960303)
Supplement: 15-00562.pdf [file 15-00562.pdf]

**On-line Table: MRI imaging recommendation and summary of key features**

| Sequence                                                                                     | Pathologies Visible                                      | Key Features                                                                                                                                                                                                                                                                                                                                            |
|----------------------------------------------------------------------------------------------|----------------------------------------------------------|---------------------------------------------------------------------------------------------------------------------------------------------------------------------------------------------------------------------------------------------------------------------------------------------------------------------------------------------------------|
| T1 volumetric high-resolution whole-brain reformatted in axial, coronal, and sagittal planes | Lewy body dementia                                       | Less consistent pattern of cerebral volume loss; a pattern of relatively focused atrophy of the midbrain, hypothalamus, and substantia innominata, with a relative sparing of the hippocampus and temporoparietal cortex; relatively little cortical atrophy                                                                                            |
|                                                                                              | Posterior cortical atrophy<br>Pituitary region           | Bilateral parieto-occipital and temporo-occipital atrophy<br>Pituitary macroadenoma: mass lesion intrinsic to pituitary >10 mm; T1 hypointense to gray matter (may be heterogeneous if hemorrhage present), T2 isointense, enhancing solid components; may extend into suprasellar region to distort optic chiasm; laterally may invade cavernous sinus |
| FLAIR, volumetric whole-brain                                                                | Focal cortical dysplasia<br>Seizure (posterior cortical) | T2 hyperintense cortical lesions<br>Blurring of gray-white matter junction<br>Focal white matter abnormal signal<br>Transmantle increased signal and abnormal gyral pattern<br>Mesial temporal sclerosis, possibly others                                                                                                                               |
|                                                                                              | Primary brain tumors                                     | Both low- and high-grade gliomas usually have associated FLAIR abnormality, involving cortex and white matter<br>Enhancement, diffusion restriction, elevated cerebral blood volume in higher grade lesions                                                                                                                                             |
|                                                                                              | Metastases                                               | Location at gray-white matter junction<br>Multiplicity<br>Heterogeneous, depending on primary lesion, hemorrhage<br>Enhancement, variable pattern<br>Edema out of proportion to size of lesion                                                                                                                                                          |
|                                                                                              | PRES                                                     | Vasogenic edema with varying cortical and subcortical involvement<br>Classically posterior but can also be in watershed distribution<br>T2/FLAIR hyperintense<br>Non-diffusion restricting<br>Variable contrast enhancement                                                                                                                             |
|                                                                                              | RCVS                                                     | Initial imaging findings may be normal<br>Convexity subarachnoid blood, lobar hemorrhage<br>Cerebral edema (similar distribution to that in PRES)                                                                                                                                                                                                       |
|                                                                                              | Migraine                                                 | T2/FLAIR punctate hyperintensities in deep white matter (often centrum semiovale, coronal radiata)                                                                                                                                                                                                                                                      |
|                                                                                              | SWI including phase and magnitude images                 | Cavernous venous malformations                                                                                                                                                                                                                                                                                                                          |
| DWI                                                                                          | CJD (and variant CJD)                                    | Prominent susceptibility effect (blooming)<br>Abnormality may be bilateral or unilateral, symmetric, or asymmetric<br>Cortical diffusion restriction (most common early feature)<br>T2 hyperintensity in putamen, caudate, and thalamus<br>Hockey stick sign, hyperintense signal in pulvinar and dorsomedial thalamic nuclei vCJD                      |

**Note:**—PRES indicates posterior reversible encephalopathy syndrome; RCVS, reversible cerebral vasoconstriction syndrome; vCJD, variant CJD.

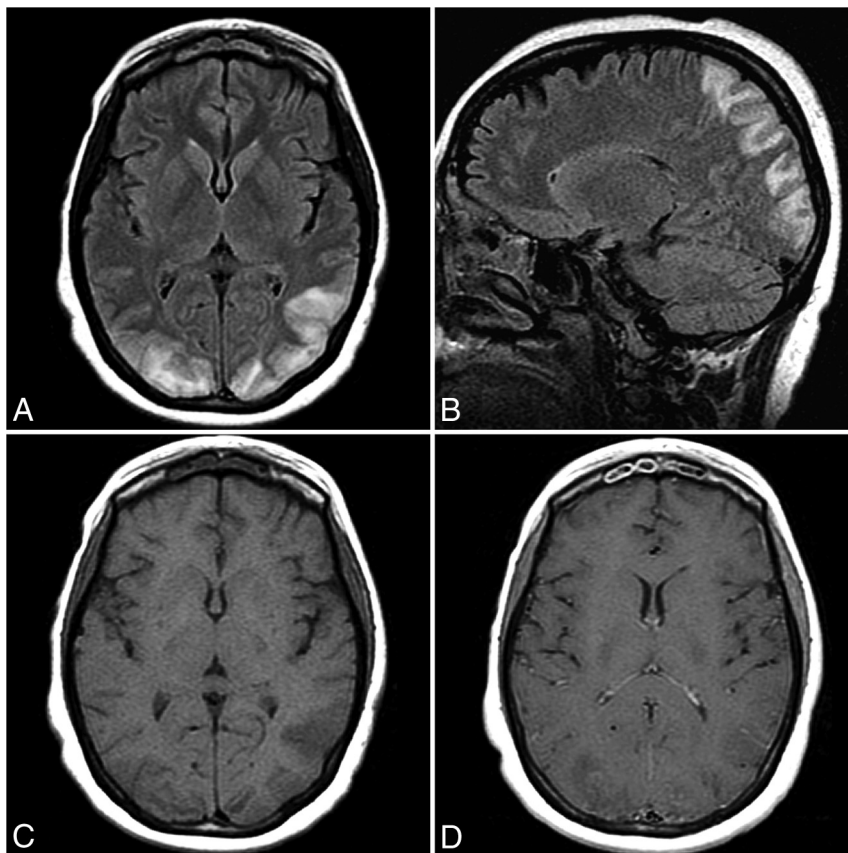

**ON-LINE FIG 1.** Posterior reversible encephalopathy syndrome: symmetric parieto-occipital vasogenic edema, with FLAIR (A and B), hyperintense T1 (C), and hypointense subcortical white matter abnormalities without contrast enhancement (D). Appearance is characteristic of posterior reversible encephalopathy syndrome.

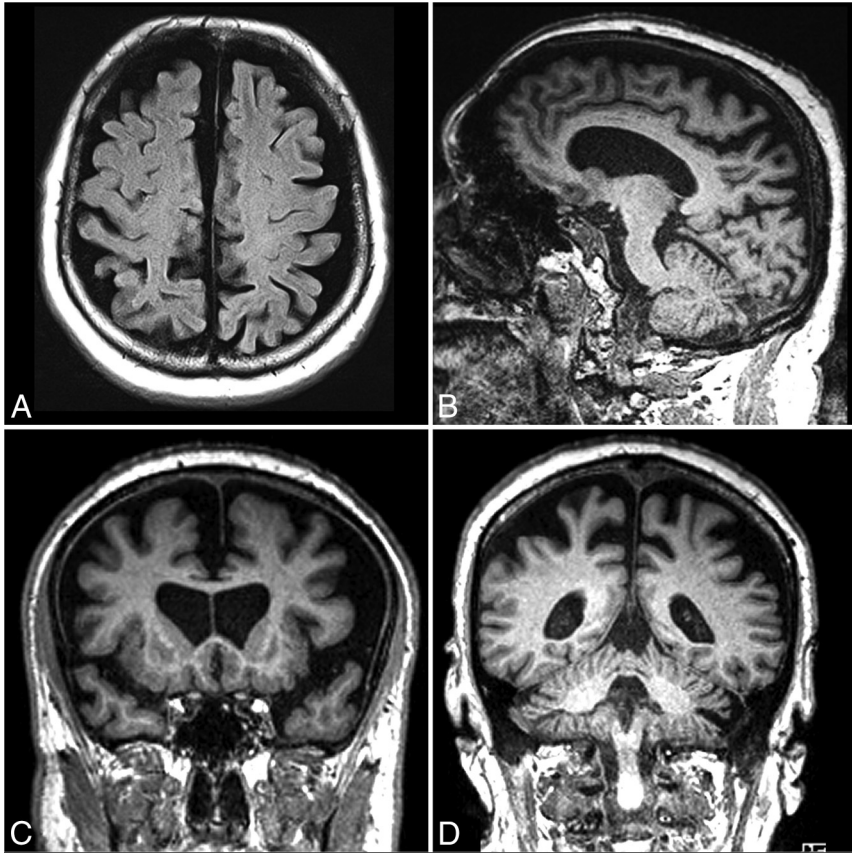

**ON-LINE FIG 2.** Lewy body dementia: multiplanar T1 imaging demonstrates global cerebral volume loss, most pronounced within the frontal and parietotemporal regions.

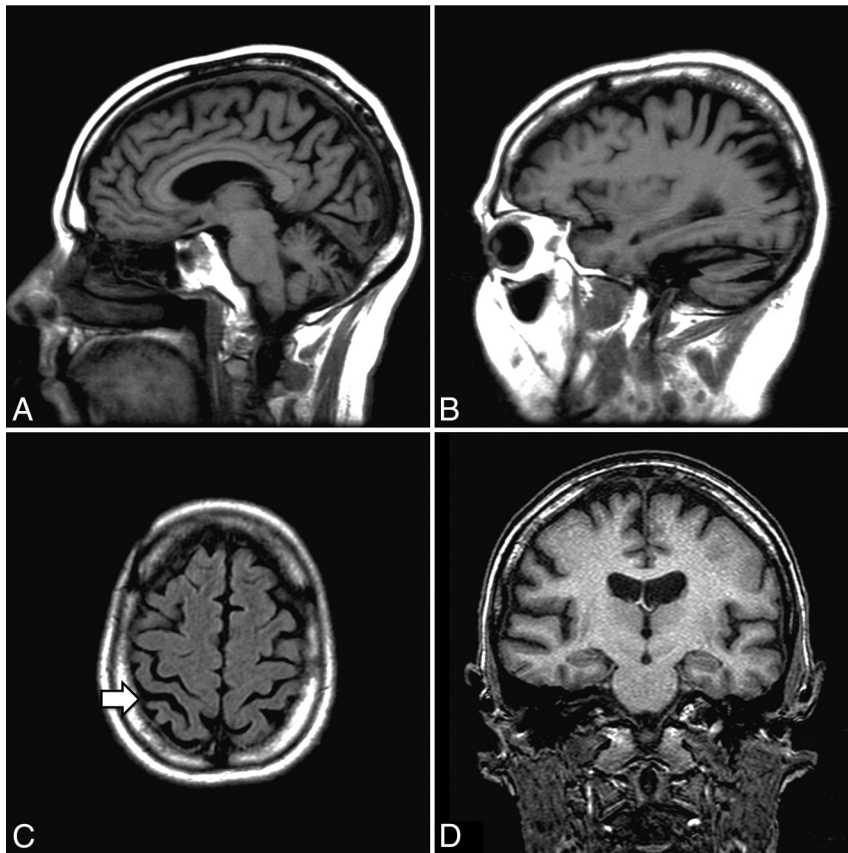

**ON-LINE FIG 3.** Posterior cortical atrophy: sagittal, axial, and coronal T1 MR imaging demonstrate prominent bilateral parieto-occipital (A and B) and temporo-occipital cortical atrophy (D), slightly more prominent within the right hemisphere (C). Features are those typical of posterior cortical atrophy.

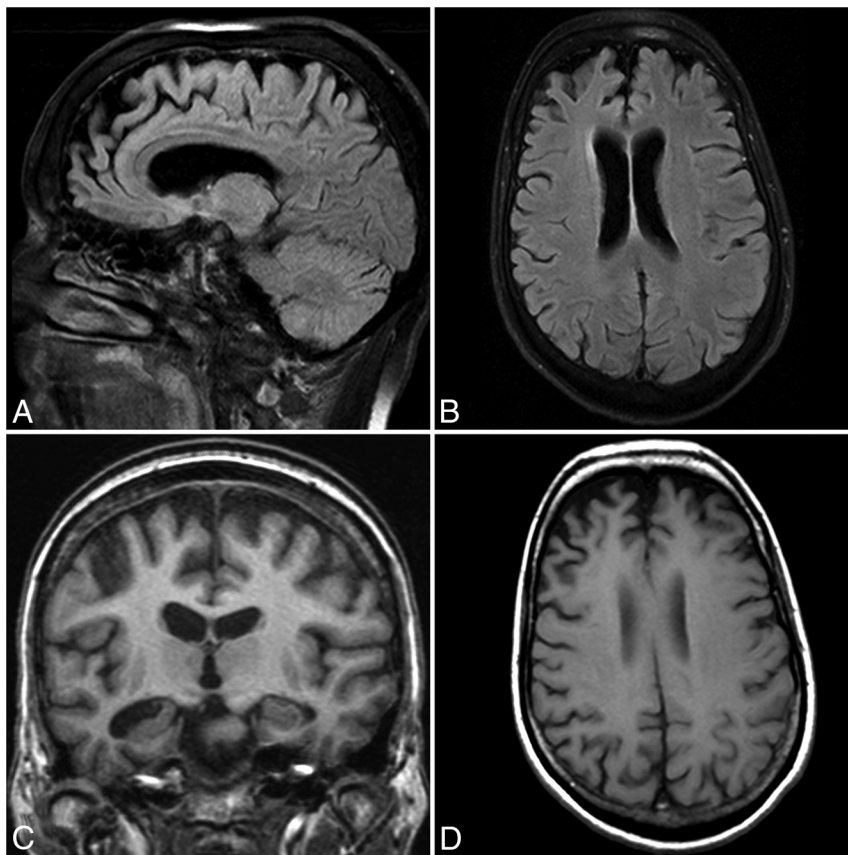

**ON-LINE FIG 4.** Frontotemporal lobar degeneration: sagittal and axial FLAIR (A and B) and T1 MR imaging (C and D) demonstrate bilateral cerebral volume loss with a striking frontotemporal predominance, consistent with the diagnosis of frontotemporal dementia.

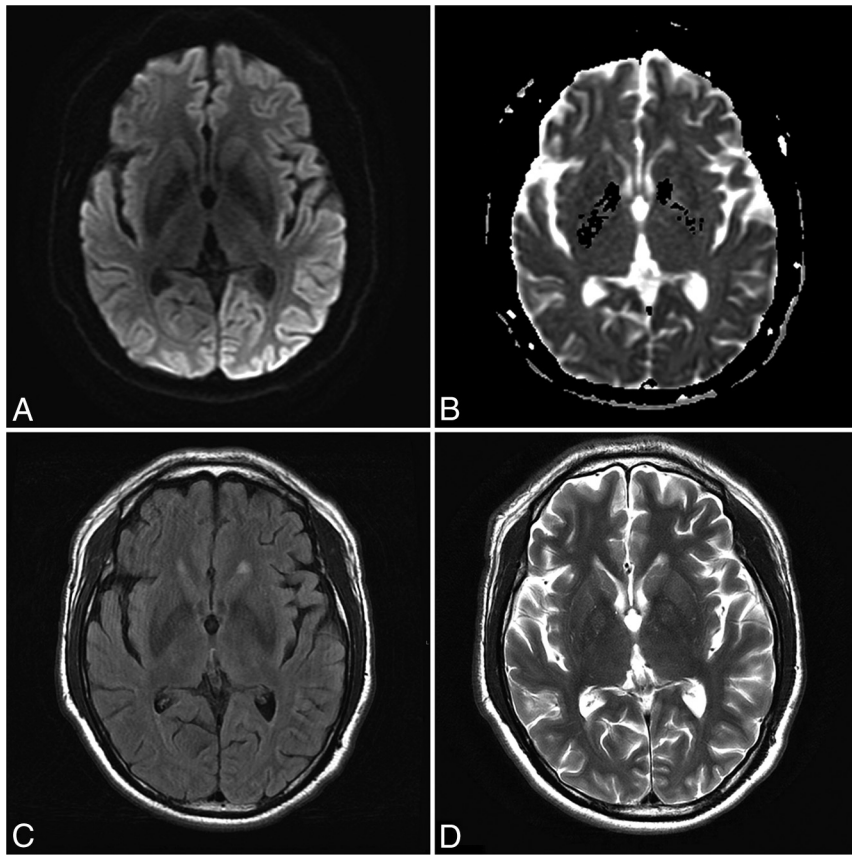

**ON-LINE FIG 5.** CJD: DWI (A) and ADC (B) sequences demonstrate cortical diffusion restriction within the frontal and occipital lobes bilaterally, with corresponding FLAIR (C) and T2 (D) hyperintensity, typical of Creutzfeldt Jakob disease. Cortical diffusion restriction is the most common early manifestation of CJD.
